# Supplementary material for: Genetic Draft and Quasi-Neutrality in Large Facultatively Sexual Populations
Source: Oxford University Press journal article supplement (doi:10.1534/genetics.111.128876), 2011-05-31
Supplement: figures1.pdf [file figures1.pdf]

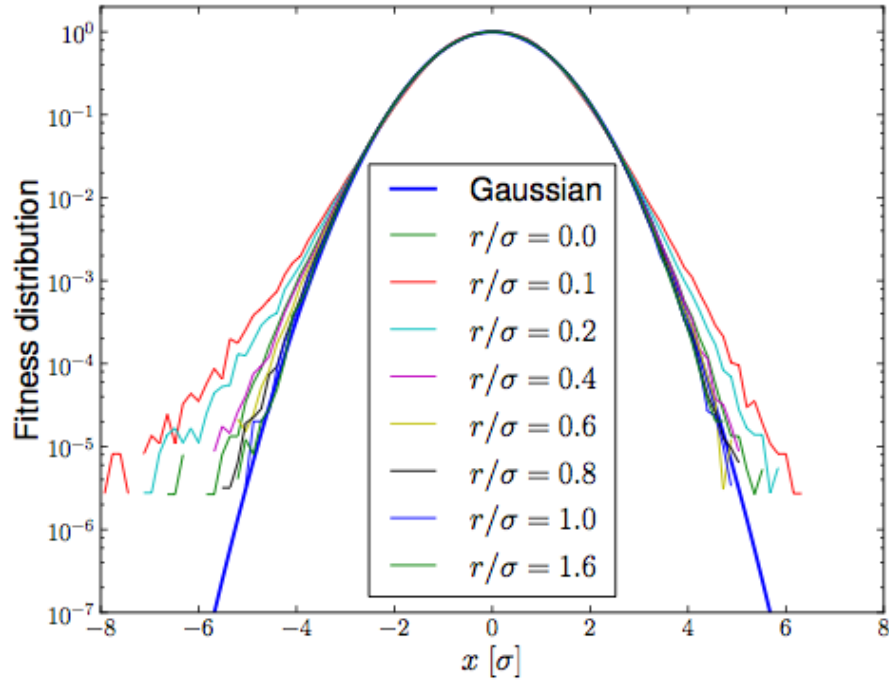

**Figure S1** The fitness distribution of a population adapting at many loci is Gaussian. The figure shows the fitness distribution measured using our computational model for different ratios  $r/\sigma$ . Only at  $r/\sigma = 0.1$  or  $0.2$ , one sees (slight) deviations from the Gaussian. Our analysis applies in the range  $1 > r/\sigma > 1/\sqrt{\log N}$ , where the fitness distribution is Gaussian all the way into the tails.
