# Supplementary material for: Genetic Draft and Quasi-Neutrality in Large Facultatively Sexual Populations
Source: Oxford University Press journal article supplement (doi:10.1534/genetics.111.128876), 2011-05-31
Supplement: figures3.pdf [file figures3.pdf]

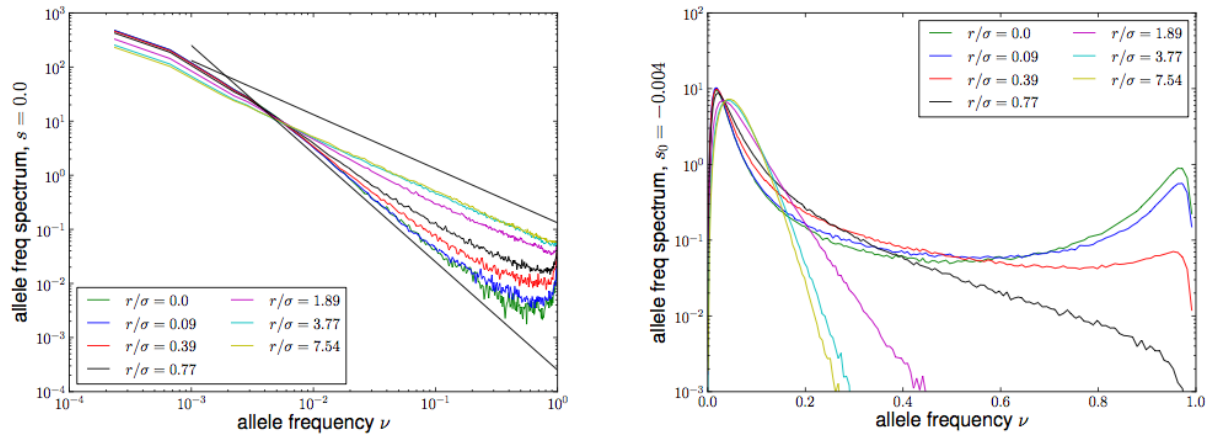

**Figure S3** Allele frequency spectra of neutral (left) and deleterious mutations (right) in a background selection scenario, in analogy to Fig. 3b of the manuscript. At low recombination rates ( $r/\sigma < 1$ ), the frequency spectrum of neutral mutations falls off much more rapidly than expected in a neutral model, very similar to what is observed for the scenario of continuous adaptation. The predicted behavior  $\sim \nu^{-2}$  is indicated by the steeper black line. Only when  $r/\sigma \gg 1$  does the spectrum agree with the neutral prediction ( $\sim \nu^{-1}$  indicated by upper straight black line). The right panel shows the frequency spectrum of the deleterious mutations responsible for the fitness variation with effect size  $s_0 = -0.004$ . At low recombination rates, allele frequencies are close to fixation, either in the bad ( $\nu = 1$ ) or the good ( $\nu = 0$ ) state. At high recombination rates, the allele frequency spectra are distributed around their equilibrium value  $\nu = \mu/s_0 = 0.0625$ .
